# Supplementary material for: Together for the Better: Improvement of a Model Based Strategy for Grapevine Downy Mildew Control by Addition of Potassium Phosphonates
Source: MDPI journal article supplement (doi:10.3390/plants9060710), 2020-06-02
Supplement: s1 [file s1]

## Supplementary Materials

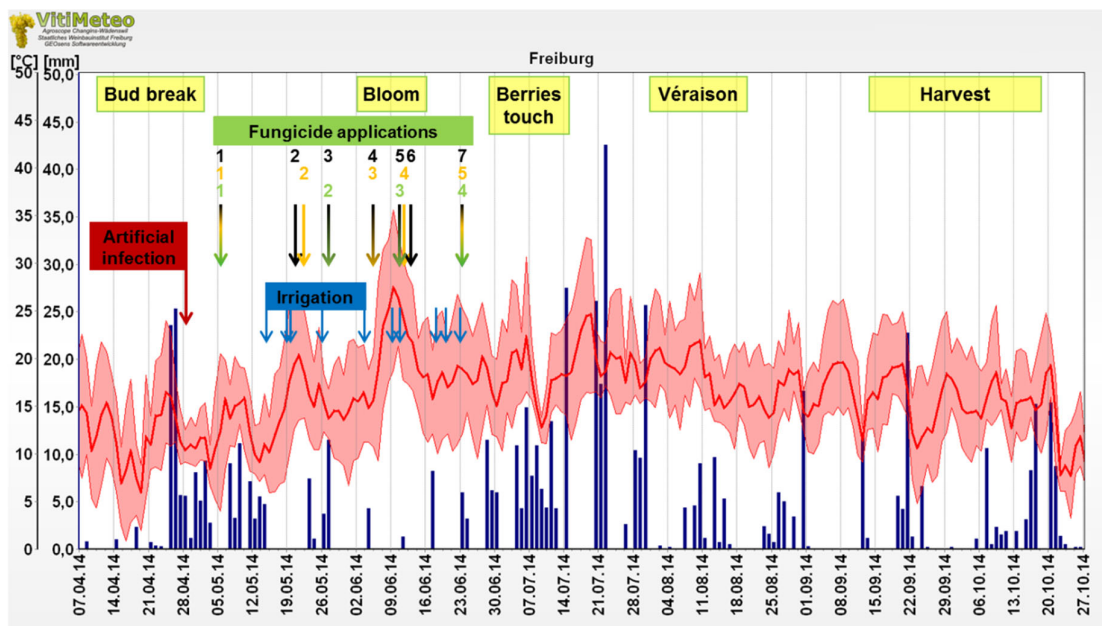

Figure S1. Weather data and experimental design 2014.

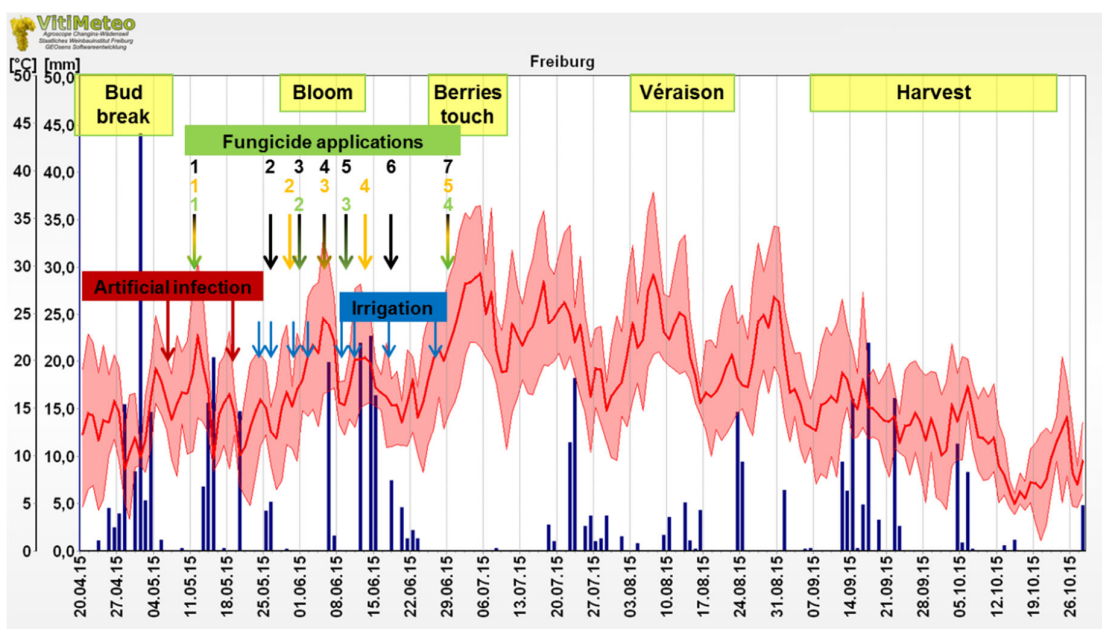

Figure S2. Weather data and experimental design 2015.

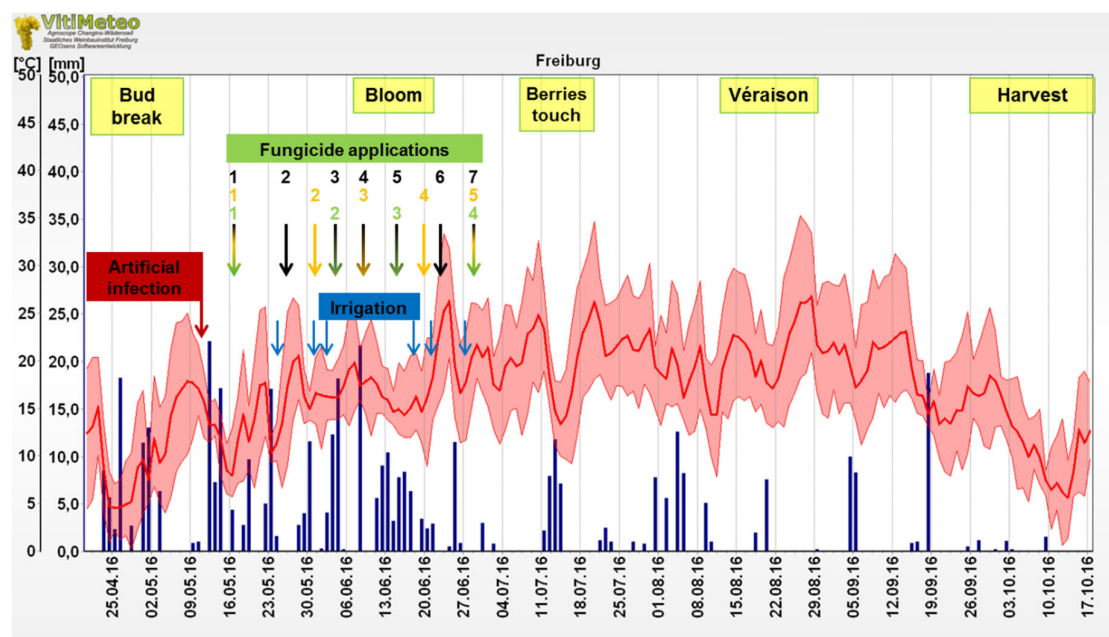

Figure S3. Weather data and experimental design 2016.

**Table S1.** Date of treatments.

| Year | NGA<br>[cm <sup>2</sup> ] | Artificial<br>Infection | 1 <sup>st</sup> Treatment | 2 <sup>nd</sup> Treatment | 3 <sup>rd</sup> Treatment | 4 <sup>th</sup> Treatment | 5 <sup>th</sup> Treatment | 6 <sup>th</sup> Treatment | 7 <sup>th</sup> Treatment | Final Folpan<br>Treatment |
|------|---------------------------|-------------------------|---------------------------|---------------------------|---------------------------|---------------------------|---------------------------|---------------------------|---------------------------|---------------------------|
| 2014 | 400                       | April 29 <sup>th</sup>  | May 6 <sup>th</sup>       | May 21 <sup>st</sup>      | May 28 <sup>th</sup>      | June 5 <sup>th</sup>      | June 10 <sup>th</sup>     | June 13 <sup>th</sup>     | June 23 <sup>rd</sup>     | June 27 <sup>th</sup>     |
|      | 600                       |                         |                           | May 23 <sup>rd</sup>      | June 5 <sup>th</sup>      | June 11 <sup>th</sup>     | June 23 <sup>rd</sup>     |                           |                           |                           |
|      | 800                       |                         |                           | May 28 <sup>th</sup>      | June 10 <sup>th</sup>     | June 23 <sup>rd</sup>     |                           |                           |                           |                           |
| 2015 | 400                       | May 7 <sup>th</sup>     | May 12 <sup>th</sup>      | May 26 <sup>th</sup>      | June 1 <sup>st</sup>      | June 5 <sup>th</sup>      | June 10 <sup>th</sup>     | June 18 <sup>th</sup>     | June 29 <sup>th</sup>     | July 8 <sup>th</sup>      |
|      | 600                       | +                       |                           | May 29 <sup>th</sup>      | June 5 <sup>th</sup>      | June 13 <sup>th</sup>     | June 29 <sup>th</sup>     |                           |                           |                           |
|      | 800                       | May 20 <sup>th</sup>    |                           | June 1 <sup>st</sup>      | June 10 <sup>th</sup>     | June 29 <sup>th</sup>     |                           |                           |                           |                           |
| 2016 | 400                       | May 11 <sup>th</sup>    | May 17 <sup>th</sup>      | May 27 <sup>th</sup>      | June 4 <sup>st</sup>      | June 10 <sup>th</sup>     | June 15 <sup>th</sup>     | June 23 <sup>rd</sup>     | June 29 <sup>th</sup>     | July 15 <sup>th</sup>     |
|      | 600                       |                         |                           | June 1 <sup>st</sup>      | June 10 <sup>th</sup>     | June 20 <sup>th</sup>     | June 29 <sup>th</sup>     |                           |                           |                           |
|      | 800                       |                         |                           | June 4 <sup>th</sup>      | June 15 <sup>th</sup>     | June 29 <sup>th</sup>     |                           |                           |                           |                           |

**Table S2.** Artificial irrigation.

| No. | 2014                  | 2015                  | 2016                  |
|-----|-----------------------|-----------------------|-----------------------|
| 1   | May 15 <sup>th</sup>  | May 24 <sup>th</sup>  | May 25 <sup>th</sup>  |
| 2   | May 19 <sup>th</sup>  | May 27 <sup>th</sup>  | May 31 <sup>st</sup>  |
| 3   | May 20 <sup>th</sup>  | May 30 <sup>th</sup>  | June 2 <sup>nd</sup>  |
| 4   | May 26 <sup>th</sup>  | June 3 <sup>rd</sup>  | June 18 <sup>th</sup> |
| 5   | June 4 <sup>th</sup>  | June 9 <sup>th</sup>  | June 21 <sup>st</sup> |
| 6   | June 9 <sup>th</sup>  | June 11 <sup>th</sup> | June 27 <sup>th</sup> |
| 7   | June 11 <sup>th</sup> | June 18 <sup>th</sup> |                       |
| 8   | June 18 <sup>th</sup> | June 27 <sup>th</sup> |                       |
| 9   | June 20 <sup>th</sup> |                       |                       |
| 10  | June 23 <sup>rd</sup> |                       |                       |
